# Supplementary material for: Adipose Tissue-Derived Mesenchymal Stem Cells Extend the Lifespan and Enhance Liver Function in Hepatocyte Organoids
Source: MDPI journal article supplement (doi:10.3390/ijms242015429), 2023-10-21
Supplement: s1 [file s1]

## **SUPPLEMENTAL METHODS**

### **Confirmation of A-MSCs**

A-MSCs derived from the adipose tissue of GFP transgenic pigs were cultured in adipogenic, osteogenic, and chondrogenic induction media for three weeks. Tissue-specific staining, including Oil Red O, Alizarin Red S, and Alcian blue staining, was performed to assess adipocyte, osteocyte, and chondrocyte differentiation, respectively [16]. Additionally, the expression levels of tissue-specific genes, such as PPARG/LDLR for adipocytes, Sox9/ACAN for chondrocytes, and RUNX2/ALPL for osteocytes, were analyzed using quantitative real-time PCR.
