# Supplementary material for: Adipose Tissue-Derived Mesenchymal Stem Cells Extend the Lifespan and Enhance Liver Function in Hepatocyte Organoids
Source: MDPI journal article supplement (doi:10.3390/ijms242015429), 2023-10-21
Supplement: s1 [file s1]

**Supplementary Table S1.** List of antibodies used for immunofluorescence staining.

| Protein        | Clonalities | Antibodies |                                          | Company   | Cat. No  | Dilution factor |
|----------------|-------------|------------|------------------------------------------|-----------|----------|-----------------|
| Albumin        | Polyclonal  | 1st        | Anti-Albumin antibody                    | Abcam     | ab112980 | 1:100           |
|                | Monoclonal  | 2nd        | Mouse anti-goat IgG-TR                   | Santacruz | sc-3916  | 1:200           |
| Cytokeratin 19 | Polyclonal  | 1st        | Anti-cytokeratin 19                      | Abcam     | ab84632  | 1:200           |
|                | Polyclonal  | 2nd        | Goat anti rabbit IgG H&L (AlexFluor 555) |           | ab150078 | 1:200           |
| E-Cadherin 1   | Polyclonal  | 1st        | E-cadherin (N-20)                        | Santacruz | sc-1500  | 1:50            |
|                | Polyclonal  | 2nd        | Donkey anti-goat Ig-FITC                 |           | sc-2024  | 1:100           |

**Supplementary Table S2.** Porcine primer sequences used for real-time RT-PCR.

| Gene                                                                              | Primer sequences                                                     | Product size (bp) | GenBank accession number |
|-----------------------------------------------------------------------------------|----------------------------------------------------------------------|-------------------|--------------------------|
| <i>Albumin (ALB)</i>                                                              | F - GAAGACACCAGTGAGCGAAAAA<br>R - AAGCAAGGCCGTCTGTTCA                | 69                | NM_001005208.1           |
| <i>Transferrin (TF)</i>                                                           | F - CCGAAGACTGTATCGCCAAGA<br>R - TAGCCTCCATCCAAGCTCATG               | 64                | X12386.1                 |
| <i>Alpha fetoprotein (AFP)</i>                                                    | F - CGTGCCTCCGCCATTCT<br>R - CTGAGCTTGGCACAGATCCTT                   | 61                | NM_214317.1              |
| <i>Serpin family A member 1 (SERPINA, AAT)</i>                                    | F - CCCAACCTGGCCGACTT<br>R - AAGATGTTGCTGGTATTGGACTGA                | 71                | NM_214395.2              |
| <i>Cadherin 1 (CDH1)</i>                                                          | F - CTCGTAATGATGTGGCACCAA<br>R - AAAGTTTCCAATTTCATCAGGATTG           | 83                | NM_001163060.1           |
| <i>Cytochrome P450 family 1 subfamily A member 2 (CYP1A2)</i>                     | F - GGCAGGGCGACGATTTC<br>R - TCAGTGACCAGAGTGAACTGTAGA                | 58                | NM_001159614.1           |
| <i>Cytochrome P450 family 3 subfamily A member 29 (CYP3A29)</i>                   | F - AGGAGGAGATTGAGGCAACTTTC<br>R - TCTGTGCCAGGGCATCGTA               | 61                | NM_214423.1              |
| <i>Keratin 19 (KRT19)</i>                                                         | F - GCAGATCAGCAAGACGGAAGT<br>R - GGCTTTCATGCTGAGCTGAGA               | 88                | XM_003131437.4           |
| <i>SRY-box transcription factor 9 (SOX9)</i>                                      | F - GTACCCGCACCTGCACAAC<br>R - TTCAGCAGTCTCCAGAGTTTGC                | 63                | NM_213843.2              |
| <i>Epithelial cell adhesion molecule (EPCAM)</i>                                  | F - AACCAGAGAATGCTATCCAGAACAAC<br>R - ACCCCAGCAGTGTTCACACA           | 124               | NM_214419.1              |
| <i>Low density lipoprotein receptor (LDLR)</i>                                    | F - GCTGGACCTAACTTCGAGTATGC<br>R - TCGGTCGTCGGGAGAAA                 | 56                | AY559453.1               |
| <i>Peroxisome proliferator activated receptor gamma (PPAR<math>\gamma</math>)</i> | F - ACACCGAGATGCCGTTTTG<br>R - CGACAGGTCCACAGAGCTGAT                 | 55                | NM_214379.1              |
| <i>Aggrecan (ACAN)</i>                                                            | F - CCGGAAGCAGCAGTCACA<br>R - TTCAAGCCAATCCACTGGTAGTC                | 96                | NM_001164652.1           |
| <i>RUNX family transcription factor 2 (RUNX2)</i>                                 | F - CAAACAGCCTCTTCAGCACAGT<br>R - GTGCTCGGATCCCAAAGAA                | 61                | XM_003482203.4           |
| <i>Telomerase reverse transcriptase (TERT)</i>                                    | F - CAC TGC GAC TAT GCC AGT TAC G<br>R - GCC CTG GTT GAA GGT GAG ACT | 63                | AY785158.1               |
| <i>Tumor protein p53 (TP53)</i>                                                   | F - AAG CCA CTG GAT GGC GAG TA<br>R - GGG CAT CCT TCA GCT CCA A      | 100               | NM_213824.3              |
| <i>CDKN1A cyclin dependent kinase inhibitor 1A (CDKN1A, p21)</i>                  | F - CCTCCCAGGGCAGGAAA<br>R - GCGTTTGGAGTGGTAGAAATCTG                 | 59                | XM_013977858.2           |
| <i>Caspase 8 (CASP8)</i>                                                          | F - GGGAAGCCCCCATCTATGA<br>R - CCCTTGACAAGCCTGAATGAA                 | 101               | NM_001031779             |
| <i>BCL2 antagonist/killer 1 (BAK1)</i>                                            | F - TCACCCTGCCCTAGAACCT<br>R - CTGGAATTCGAGTCGTATCG                  | 101               | XM_001928147.2           |
| <i>BCL2 apoptosis regulator (BCL2)</i>                                            | F - GGTACCGGAGGGCATTTCAGT<br>R - TCCCAGGAAGAGTTCGTTCAA               | 100               | NM_214285.1              |
| <i>Hypoxanthine phosphoribosyltransferase 1 (HPRT1)</i>                           | F - CGGCTTGCTCGAGATGTGAT<br>R - AGCACACAGAGGGCTACGATGT               | 62                | NM_001032376.2           |
