# Supplementary material for: Adipose Tissue-Derived Mesenchymal Stem Cells Extend the Lifespan and Enhance Liver Function in Hepatocyte Organoids
Source: Int J Mol Sci. 2023 Oct 21;24(20):15429. doi: 10.3390/ijms242015429 (PMC10607770; doi:10.3390/ijms242015429)
Supplement: Supplementary file 1 [file ijms-24-15429-s001.zip]

Archive with 4 entries (4 files):
- Supplementary Figures S1-S5.zip
- Supplemetary Figures Legends.pdf
- Supplemetary Methods.pdf
- Supplemetary Tables S1-S2.pdf
